# Supplementary material
Source: publisher figshare collection journal article supplement (https://acs.figshare.com/ndownloader/files/5059768)
Supplement: Supplementary file 1 [file 5059768]

data_xrs
 
_audit_creation_method            SHELXL-97
_chemical_name_systematic
;
 ?
;
_chemical_name_common             ?
_chemical_melting_point           ?
_chemical_formula_moiety          ?
_chemical_formula_sum
 'C20 H4 F10 O4'
_chemical_formula_weight          498.23
 
loop_
 _atom_type_symbol
 _atom_type_description
 _atom_type_scat_dispersion_real
 _atom_type_scat_dispersion_imag
 _atom_type_scat_source
 'C'  'C'   0.0033   0.0016
 'International Tables Vol C Tables 4.2.6.8 and 6.1.1.4'
 'H'  'H'   0.0000   0.0000
 'International Tables Vol C Tables 4.2.6.8 and 6.1.1.4'
 'O'  'O'   0.0106   0.0060
 'International Tables Vol C Tables 4.2.6.8 and 6.1.1.4'
 'F'  'F'   0.0171   0.0103
 'International Tables Vol C Tables 4.2.6.8 and 6.1.1.4'
 
_symmetry_cell_setting            Monoclinic
_symmetry_space_group_name_H-M    P2(1)/c
 
loop_
 _symmetry_equiv_pos_as_xyz
 'x, y, z'
 '-x, y+1/2, -z+1/2'
 '-x, -y, -z'
 'x, -y-1/2, z-1/2'
 
_cell_length_a                    21.034(2)
_cell_length_b                    4.9644(9)
_cell_length_c                    18.847(3)
_cell_angle_alpha                 90.00
_cell_angle_beta                  108.888(12)
_cell_angle_gamma                 90.00
_cell_volume                      1862.1(5)
_cell_formula_units_Z             4
_cell_measurement_temperature     295(2)
_cell_measurement_reflns_used     12
_cell_measurement_theta_min       10
_cell_measurement_theta_max       11
 
_exptl_crystal_description        ?
_exptl_crystal_colour             ?
_exptl_crystal_size_max           0.10
_exptl_crystal_size_mid           0.10
_exptl_crystal_size_min           0.10
_exptl_crystal_density_meas       ?
_exptl_crystal_density_diffrn     1.777
_exptl_crystal_density_method     'not measured'
_exptl_crystal_F_000              984
_exptl_absorpt_coefficient_mu     0.189
_exptl_absorpt_correction_type    numerical
_exptl_absorpt_correction_T_min   0.98
_exptl_absorpt_correction_T_max   0.99
_exptl_absorpt_process_details    XCALIBUR
 
_exptl_special_details
;
 ?
;
 
_diffrn_ambient_temperature       295(2)
_diffrn_radiation_wavelength      0.71073
_diffrn_radiation_type            MoK\a
_diffrn_radiation_source          'fine-focus sealed tube'
_diffrn_radiation_monochromator   graphite
_diffrn_measurement_device_type   ?
_diffrn_measurement_method        ' \w scans'
_diffrn_detector_area_resol_mean  ?
_diffrn_standards_number          1
_diffrn_standards_interval_count  120
_diffrn_standards_interval_time   ?
_diffrn_standards_decay_%         0
_diffrn_reflns_number             13313
_diffrn_reflns_av_R_equivalents   0.0600
_diffrn_reflns_av_sigmaI/netI     0.0513
_diffrn_reflns_limit_h_min        -25
_diffrn_reflns_limit_h_max        25
_diffrn_reflns_limit_k_min        -6
_diffrn_reflns_limit_k_max        5
_diffrn_reflns_limit_l_min        -19
_diffrn_reflns_limit_l_max        23
_diffrn_reflns_theta_min          3.99
_diffrn_reflns_theta_max          26.06
_reflns_number_total              3656
_reflns_number_gt                 1491
_reflns_threshold_expression      >2sigma(I)
 
_computing_data_collection        'SIEMENS SHELXTL Plus'
_computing_cell_refinement        'SIEMENS SHELXTL Plus'
_computing_data_reduction         'SIEMENS SHELXTL Plus'
_computing_structure_solution     'SHELXS-97 (Sheldrick, 1990)'
_computing_structure_refinement   'SHELXL-97 (Sheldrick, 1997)'
_computing_molecular_graphics     SHELXLTL-Plus
_computing_publication_material   SHELXL-93
 
_refine_special_details
;
 Refinement of F^2^ against ALL reflections.  The weighted R-factor wR and
 goodness of fit S are based on F^2^, conventional R-factors R are based
 on F, with F set to zero for negative F^2^. The threshold expression of
 F^2^ > 2sigma(F^2^) is used only for calculating R-factors(gt) etc. and is
 not relevant to the choice of reflections for refinement.  R-factors based
 on F^2^ are statistically about twice as large as those based on F, and R-
 factors based on ALL data will be even larger.
;
 
_refine_ls_structure_factor_coef  Fsqd
_refine_ls_matrix_type            full
_refine_ls_weighting_scheme       calc
_refine_ls_weighting_details
 'calc w=1/[\s^2^(Fo^2^)+(0.2000P)^2^+0.0000P] where P=(Fo^2^+2Fc^2^)/3'
_atom_sites_solution_primary      direct
_atom_sites_solution_secondary    difmap
_atom_sites_solution_hydrogens    geom
_refine_ls_hydrogen_treatment     constr
_refine_ls_extinction_method      none
_refine_ls_extinction_coef        ?
_refine_ls_number_reflns          3656
_refine_ls_number_parameters      343
_refine_ls_number_restraints      126
_refine_ls_R_factor_all           0.1793
_refine_ls_R_factor_gt            0.0967
_refine_ls_wR_factor_ref          0.3382
_refine_ls_wR_factor_gt           0.2847
_refine_ls_goodness_of_fit_ref    0.997
_refine_ls_restrained_S_all       1.015
_refine_ls_shift/su_max           0.011
_refine_ls_shift/su_mean          0.001
 
loop_
 _atom_site_label
 _atom_site_type_symbol
 _atom_site_fract_x
 _atom_site_fract_y
 _atom_site_fract_z
 _atom_site_U_iso_or_equiv
 _atom_site_adp_type
 _atom_site_occupancy
 _atom_site_symmetry_multiplicity
 _atom_site_calc_flag
 _atom_site_refinement_flags
 _atom_site_disorder_assembly
 _atom_site_disorder_group
C1 C 0.61367(16) 0.7279(7) 0.45759(16) 0.0968(10) Uani 1 1 d D . .
F1 F 0.62589(10) 0.9279(5) 0.50766(12) 0.1281(7) Uani 1 1 d D . .
C2 C 0.54818(16) 0.6367(7) 0.43159(18) 0.1055(11) Uani 1 1 d D . .
F2 F 0.50135(10) 0.7453(6) 0.45694(13) 0.1508(9) Uani 1 1 d D . .
C3 C 0.53185(15) 0.4388(7) 0.37969(19) 0.1027(11) Uani 1 1 d D . .
F3 F 0.46869(10) 0.3446(5) 0.35444(14) 0.1454(9) Uani 1 1 d D . .
C4 C 0.57948(15) 0.3264(7) 0.35412(17) 0.0936(10) Uani 1 1 d D . .
F4 F 0.56366(11) 0.1263(5) 0.30281(13) 0.1327(8) Uani 1 1 d D . .
C5 C 0.64435(14) 0.4172(6) 0.37993(15) 0.0838(9) Uani 1 1 d D . .
F5 F 0.68917(9) 0.2990(4) 0.35262(9) 0.1029(6) Uani 1 1 d D . .
C6 C 0.66348(14) 0.6213(6) 0.43244(15) 0.0814(9) Uani 1 1 d D . .
C7 C 0.73215(15) 0.7377(6) 0.46111(15) 0.0842(9) Uani 1 1 d D . .
O7 O 0.74652(13) 0.9347(5) 0.50045(15) 0.1203(9) Uani 1 1 d D . .
O8 O 0.77667(10) 0.6032(4) 0.43893(11) 0.0934(7) Uani 1 1 d D . .
C9 C 0.84472(15) 0.7069(7) 0.46533(19) 0.1017(11) Uani 1 1 d D . .
H9A H 0.8463 0.8854 0.4450 0.122 Uiso 1 1 calc R . .
H9B H 0.8604 0.7189 0.5196 0.122 Uiso 1 1 calc R . .
C10 C 0.88641(15) 0.5243(7) 0.44061(18) 0.0976(11) Uani 1 1 d D . .
C11 C 0.92165(15) 0.3713(7) 0.42232(18) 0.0939(10) Uani 1 1 d D . .
C18 C 1.2567(2) -0.1734(9) 0.3451(3) 0.0787(13) Uiso 0.60 1 d PD A 1
F18 F 1.27626(15) -0.3732(7) 0.39259(18) 0.1089(11) Uani 0.60 1 d PD A 1
C19 C 1.3055(2) -0.0605(11) 0.3200(3) 0.0904(16) Uiso 0.60 1 d PD A 1
F19 F 1.36620(16) -0.1578(9) 0.3427(2) 0.1329(15) Uani 0.60 1 d PD A 1
C20 C 1.2897(2) 0.1439(10) 0.2721(3) 0.0782(13) Uiso 0.60 1 d PD A 1
F20 F 1.33416(15) 0.2631(9) 0.2462(2) 0.1286(13) Uani 0.60 1 d PD A 1
C21 C 1.2255(2) 0.2436(9) 0.2469(2) 0.0715(12) Uiso 0.60 1 d PD A 1
F21 F 1.20626(16) 0.4530(6) 0.19665(16) 0.1071(10) Uani 0.60 1 d PD A 1
C22 C 1.17506(19) 0.1255(9) 0.2720(2) 0.0684(11) Uiso 0.60 1 d PD A 1
F22 F 1.11400(15) 0.2242(6) 0.24723(16) 0.1037(10) Uani 0.60 1 d PD A 1
C17 C 1.1926(2) -0.0904(9) 0.3240(3) 0.0743(13) Uiso 0.60 1 d PD A 1
C16 C 1.1426(2) -0.2149(9) 0.3530(3) 0.0797(13) Uiso 0.60 1 d PD A 1
O16 O 1.14321(19) -0.4466(8) 0.3719(2) 0.1112(12) Uiso 0.60 1 d PD A 1
O15 O 1.09283(15) -0.0521(7) 0.35451(19) 0.0822(9) Uiso 0.60 1 d PD A 1
C14 C 1.0372(2) -0.1787(10) 0.3748(3) 0.0890(16) Uiso 0.60 1 d PD A 1
H14C H 1.0106 -0.2927 0.3342 0.107 Uiso 0.60 1 calc PR A 1
H14D H 1.0550 -0.2883 0.4194 0.107 Uiso 0.60 1 calc PR A 1
C13 C 0.9971(3) 0.0325(12) 0.3880(4) 0.1011(10) Uiso 0.60 1 d PD A 1
C12 C 0.9625(3) 0.1920(12) 0.4032(4) 0.0970(10) Uani 0.60 1 d PD A 1
C18D C 1.2297(3) -0.2213(14) 0.3542(4) 0.085(2) Uiso 0.40 1 d PD A 2
F18D F 1.2119(3) -0.4073(9) 0.3961(3) 0.130(2) Uani 0.40 1 d PD A 2
C19D C 1.2953(3) -0.2032(15) 0.3535(4) 0.090(2) Uiso 0.40 1 d PD A 2
F19D F 1.3365(3) -0.3911(11) 0.3961(3) 0.136(2) Uani 0.40 1 d PD A 2
C20D C 1.3122(3) -0.0279(15) 0.3099(4) 0.079(2) Uiso 0.40 1 d PD A 2
F20D F 1.3768(2) -0.0465(15) 0.3145(4) 0.146(3) Uani 0.40 1 d PD A 2
C21D C 1.2684(3) 0.1525(16) 0.2648(5) 0.093(3) Uiso 0.40 1 d PD A 2
F21D F 1.2973(4) 0.3185(13) 0.2305(3) 0.163(3) Uani 0.40 1 d PD A 2
C22D C 1.2041(3) 0.1424(15) 0.2675(4) 0.094(2) Uiso 0.40 1 d PD A 2
F22D F 1.1657(4) 0.3329(12) 0.2263(3) 0.180(3) Uani 0.40 1 d PD A 2
C17D C 1.1827(3) -0.0400(14) 0.3119(4) 0.073(2) Uiso 0.40 1 d PD A 2
C16D C 1.1103(4) -0.065(2) 0.3072(5) 0.146(4) Uiso 0.40 1 d PD A 2
O16D O 1.0664(5) 0.051(2) 0.2595(6) 0.217(5) Uiso 0.40 1 d PD A 2
O15D O 1.1029(3) -0.1604(15) 0.3669(4) 0.122(2) Uiso 0.40 1 d PD A 2
C14D C 1.0340(5) -0.188(3) 0.3676(7) 0.215(9) Uiso 0.40 1 d PD A 2
H14A H 1.0068 -0.2413 0.3174 0.258 Uiso 0.40 1 calc PR A 2
H14B H 1.0336 -0.3379 0.4004 0.258 Uiso 0.40 1 calc PR A 2
C13D C 1.0004(4) 0.0255(19) 0.3887(6) 0.1011(10) Uiso 0.40 1 d PD A 2
C12D C 0.9643(4) 0.1849(19) 0.4026(6) 0.0970(10) Uani 0.40 1 d PD A 2
 
loop_
 _atom_site_aniso_label
 _atom_site_aniso_U_11
 _atom_site_aniso_U_22
 _atom_site_aniso_U_33
 _atom_site_aniso_U_23
 _atom_site_aniso_U_13
 _atom_site_aniso_U_12
C1 0.117(2) 0.101(2) 0.0705(17) 0.0027(17) 0.0276(16) 0.0167(18)
F1 0.1388(14) 0.1374(16) 0.1100(13) -0.0342(12) 0.0427(11) 0.0259(12)
C2 0.108(2) 0.124(3) 0.086(2) 0.000(2) 0.0327(17) 0.023(2)
F2 0.1248(13) 0.189(2) 0.1512(17) -0.0059(16) 0.0624(12) 0.0380(15)
C3 0.0853(18) 0.128(3) 0.089(2) 0.016(2) 0.0204(16) -0.0064(19)
F3 0.0991(13) 0.183(2) 0.1444(17) 0.0035(17) 0.0264(12) -0.0086(14)
C4 0.103(2) 0.092(2) 0.0806(18) -0.0052(17) 0.0221(16) -0.0074(18)
F4 0.1355(15) 0.1338(16) 0.1224(14) -0.0275(14) 0.0328(12) -0.0301(13)
C5 0.0996(18) 0.0849(19) 0.0697(16) 0.0017(15) 0.0312(14) -0.0003(16)
F5 0.1176(11) 0.1051(12) 0.0940(10) -0.0288(9) 0.0452(9) -0.0132(10)
C6 0.0974(18) 0.088(2) 0.0584(15) 0.0074(15) 0.0244(13) 0.0115(16)
C7 0.1092(19) 0.0824(19) 0.0608(15) -0.0061(14) 0.0272(14) 0.0000(16)
O7 0.1331(17) 0.1108(16) 0.1189(17) -0.0335(14) 0.0434(14) -0.0117(14)
O8 0.0975(12) 0.0950(14) 0.0901(13) -0.0192(11) 0.0336(10) -0.0123(11)
C9 0.103(2) 0.101(2) 0.095(2) -0.0007(19) 0.0241(17) -0.0149(18)
C10 0.0988(19) 0.106(2) 0.091(2) -0.0048(18) 0.0341(16) -0.0228(18)
C11 0.0853(17) 0.108(2) 0.091(2) 0.0027(18) 0.0316(15) -0.0218(17)
F18 0.0992(17) 0.111(2) 0.117(2) 0.0038(19) 0.0354(16) 0.0278(17)
F19 0.0924(19) 0.158(3) 0.147(3) -0.005(3) 0.0365(19) 0.027(2)
F20 0.1087(19) 0.160(3) 0.130(2) -0.035(2) 0.0565(17) -0.033(2)
F21 0.143(2) 0.112(2) 0.0752(16) 0.0204(16) 0.0479(15) -0.0136(18)
F22 0.0979(17) 0.127(2) 0.0778(16) 0.0323(17) 0.0169(14) 0.0107(18)
C12 0.0903(18) 0.109(2) 0.094(2) -0.0025(19) 0.0326(16) -0.0271(19)
F18D 0.217(5) 0.088(3) 0.083(3) 0.013(3) 0.043(3) 0.006(3)
F19D 0.164(4) 0.123(4) 0.114(4) 0.005(3) 0.034(3) 0.042(4)
F20D 0.095(3) 0.191(6) 0.158(5) -0.052(5) 0.050(3) -0.024(4)
F21D 0.290(8) 0.112(4) 0.096(3) 0.007(3) 0.075(4) -0.052(5)
F22D 0.317(9) 0.118(4) 0.091(4) 0.002(3) 0.046(5) 0.072(5)
C12D 0.0903(18) 0.109(2) 0.094(2) -0.0025(19) 0.0326(16) -0.0271(19)
 
_geom_special_details
;
 All esds (except the esd in the dihedral angle between two l.s. planes)
 are estimated using the full covariance matrix.  The cell esds are taken
 into account individually in the estimation of esds in distances, angles
 and torsion angles; correlations between esds in cell parameters are only
 used when they are defined by crystal symmetry.  An approximate (isotropic)
 treatment of cell esds is used for estimating esds involving l.s. planes.
;
 
loop_
 _geom_bond_atom_site_label_1
 _geom_bond_atom_site_label_2
 _geom_bond_distance
 _geom_bond_site_symmetry_2
 _geom_bond_publ_flag
C1 F1 1.336(4) . ?
C1 C2 1.380(4) . ?
C1 C6 1.387(4) . ?
C2 F2 1.340(4) . ?
C2 C3 1.350(5) . ?
C3 F3 1.342(4) . ?
C3 C4 1.364(5) . ?
C4 F4 1.351(4) . ?
C4 C5 1.368(4) . ?
C5 F5 1.346(3) . ?
C5 C6 1.382(4) . ?
C6 C7 1.486(4) . ?
C7 O7 1.205(4) . ?
C7 O8 1.323(4) . ?
O8 C9 1.449(4) . ?
C9 C10 1.439(5) . ?
C10 C11 1.188(5) . ?
C11 C12 1.364(7) . ?
C11 C12D 1.419(9) . ?
C18 F18 1.310(5) . ?
C18 C17 1.341(6) . ?
C18 C19 1.381(7) . ?
C19 F19 1.301(6) . ?
C19 C20 1.327(7) . ?
C20 F20 1.327(6) . ?
C20 C21 1.371(6) . ?
C21 F21 1.376(5) . ?
C21 C22 1.421(6) . ?
C22 F22 1.311(5) . ?
C22 C17 1.419(6) . ?
C17 C16 1.469(6) . ?
C16 O16 1.203(6) . ?
C16 O15 1.330(5) . ?
O15 C14 1.483(6) . ?
C14 C13 1.417(7) . ?
C13 C12 1.173(7) . ?
C18D F18D 1.346(8) . ?
C18D C17D 1.383(8) . ?
C18D C19D 1.387(9) . ?
C19D C20D 1.322(10) . ?
C19D F19D 1.347(8) . ?
C20D F20D 1.337(8) . ?
C20D C21D 1.366(9) . ?
C21D F21D 1.312(9) . ?
C21D C22D 1.370(9) . ?
C22D F22D 1.321(8) . ?
C22D C17D 1.402(9) . ?
C17D C16D 1.501(9) . ?
C16D O16D 1.207(11) . ?
C16D O15D 1.276(10) . ?
O15D C14D 1.459(10) . ?
C14D C13D 1.401(11) . ?
C13D C12D 1.183(10) . ?
 
loop_
 _geom_angle_atom_site_label_1
 _geom_angle_atom_site_label_2
 _geom_angle_atom_site_label_3
 _geom_angle
 _geom_angle_site_symmetry_1
 _geom_angle_site_symmetry_3
 _geom_angle_publ_flag
F1 C1 C2 115.8(3) . . ?
F1 C1 C6 122.1(3) . . ?
C2 C1 C6 122.1(3) . . ?
F2 C2 C3 120.5(3) . . ?
F2 C2 C1 120.4(3) . . ?
C3 C2 C1 119.1(3) . . ?
F3 C3 C2 120.1(3) . . ?
F3 C3 C4 119.2(3) . . ?
C2 C3 C4 120.7(3) . . ?
F4 C4 C3 121.0(3) . . ?
F4 C4 C5 118.9(3) . . ?
C3 C4 C5 120.1(3) . . ?
F5 C5 C4 117.5(3) . . ?
F5 C5 C6 121.1(2) . . ?
C4 C5 C6 121.5(3) . . ?
C5 C6 C1 116.6(3) . . ?
C5 C6 C7 124.7(3) . . ?
C1 C6 C7 118.7(3) . . ?
O7 C7 O8 122.8(3) . . ?
O7 C7 C6 124.1(3) . . ?
O8 C7 C6 113.1(2) . . ?
C7 O8 C9 115.7(2) . . ?
C10 C9 O8 107.6(3) . . ?
C11 C10 C9 178.1(4) . . ?
C10 C11 C12 178.4(4) . . ?
C10 C11 C12D 178.3(6) . . ?
C12 C11 C12D 0.2(6) . . ?
F18 C18 C17 119.9(4) . . ?
F18 C18 C19 115.9(4) . . ?
C17 C18 C19 124.1(4) . . ?
F19 C19 C20 120.8(5) . . ?
F19 C19 C18 119.7(5) . . ?
C20 C19 C18 119.5(4) . . ?
C19 C20 F20 122.7(4) . . ?
C19 C20 C21 121.0(5) . . ?
F20 C20 C21 116.3(4) . . ?
C20 C21 F21 123.3(4) . . ?
C20 C21 C22 119.5(4) . . ?
F21 C21 C22 117.1(4) . . ?
F22 C22 C17 122.3(4) . . ?
F22 C22 C21 118.6(4) . . ?
C17 C22 C21 119.1(4) . . ?
C18 C17 C22 116.7(4) . . ?
C18 C17 C16 122.2(4) . . ?
C22 C17 C16 121.2(4) . . ?
O16 C16 O15 120.6(4) . . ?
O16 C16 C17 124.8(4) . . ?
O15 C16 C17 114.5(4) . . ?
C16 O15 C14 116.1(4) . . ?
C13 C14 O15 107.2(4) . . ?
C12 C13 C14 174.1(8) . . ?
C13 C12 C11 178.1(7) . . ?
F18D C18D C17D 120.2(6) . . ?
F18D C18D C19D 121.2(6) . . ?
C17D C18D C19D 118.6(6) . . ?
C20D C19D F19D 125.2(7) . . ?
C20D C19D C18D 121.2(6) . . ?
F19D C19D C18D 113.5(6) . . ?
C19D C20D F20D 112.7(6) . . ?
C19D C20D C21D 123.7(7) . . ?
F20D C20D C21D 123.6(7) . . ?
F21D C21D C20D 113.0(7) . . ?
F21D C21D C22D 131.5(7) . . ?
C20D C21D C22D 115.3(7) . . ?
F22D C22D C21D 112.0(7) . . ?
F22D C22D C17D 124.0(7) . . ?
C21D C22D C17D 123.9(6) . . ?
C18D C17D C22D 117.2(6) . . ?
C18D C17D C16D 120.1(7) . . ?
C22D C17D C16D 122.3(6) . . ?
O16D C16D O15D 123.4(10) . . ?
O16D C16D C17D 121.5(10) . . ?
O15D C16D C17D 113.0(7) . . ?
C16D O15D C14D 116.6(7) . . ?
C13D C14D O15D 121.7(9) . . ?
C12D C13D C14D 171.0(10) . . ?
 
_diffrn_measured_fraction_theta_max    0.995
_diffrn_reflns_theta_full              26.06
_diffrn_measured_fraction_theta_full   0.995
_refine_diff_density_max    0.413
_refine_diff_density_min   -0.267
_refine_diff_density_rms    0.081
